# Supplementary material
Source: PubMed Central journal article supplement (PMC3108145)

**Supplemental Figure 1**

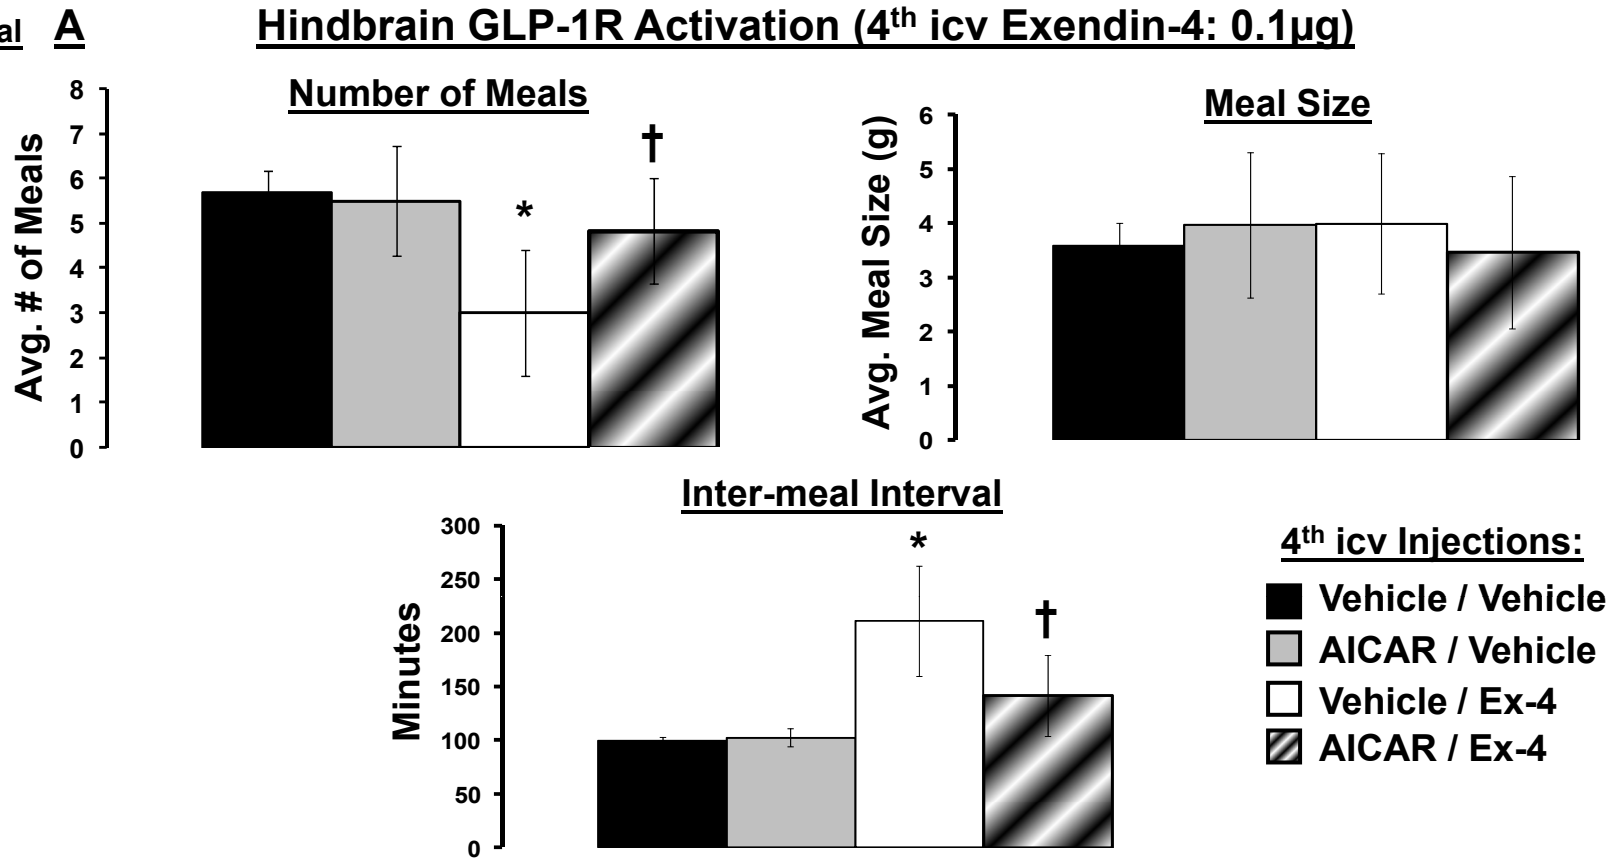

**B** **Peripheral GLP-1R Activation (IP Exendin-4: 3 $\mu$ g/kg)**

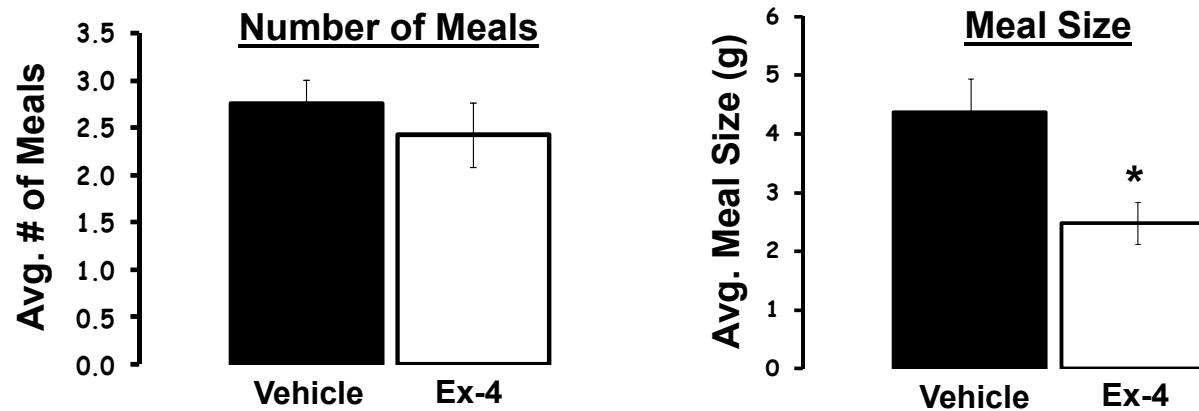

Supplement: NIHMS280157-supplement-01.pdf [file NIHMS280157-supplement-01.pdf]
